# Supplementary material for: A multi-shelled CeO2/Co@N-doped hollow carbon microsphere as a trifunctional electrocatalyst for a rechargeable zinc–air battery and overall water splitting
Source: Royal Society of Chemistry journal article supplement (doi:10.1039/d0se00735h), 2020-01-01
Supplement: d0se00735h1.pdf [file d0se00735h1.pdf]

**-Electronic Supplementary Information-**

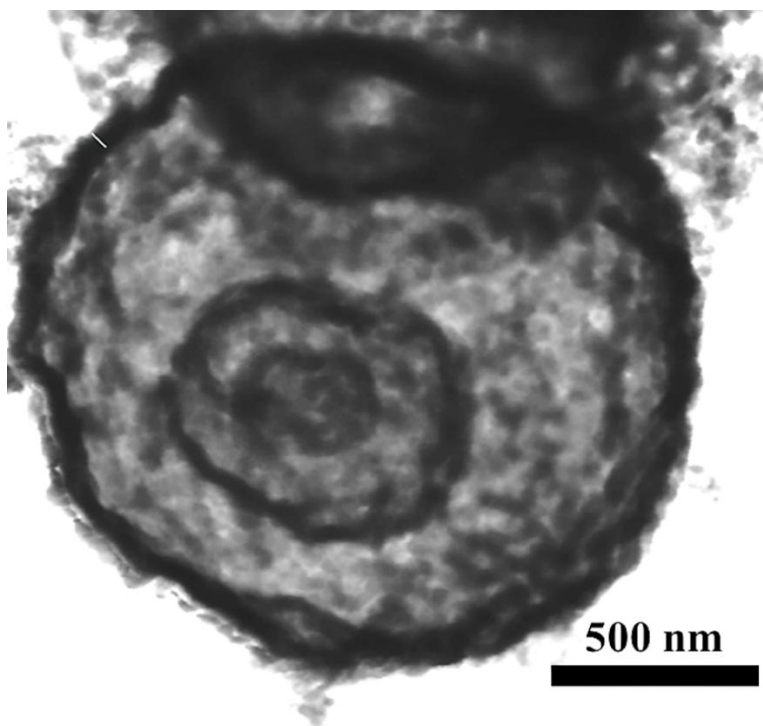

**Figure S1.** Enlarge TEM images of CeO<sub>2</sub>/Co@NCH.

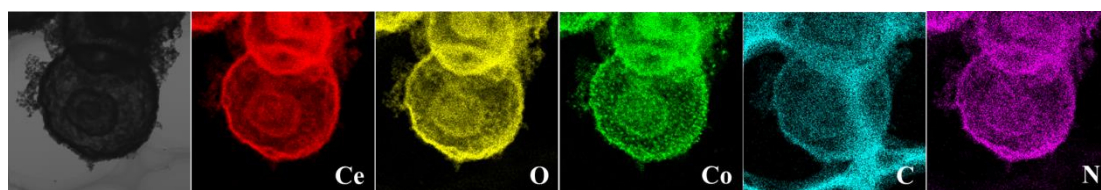

**Figure S2.** The element mapping of Ce, O, Co, C, N in CeO<sub>2</sub>/Co@NCH.

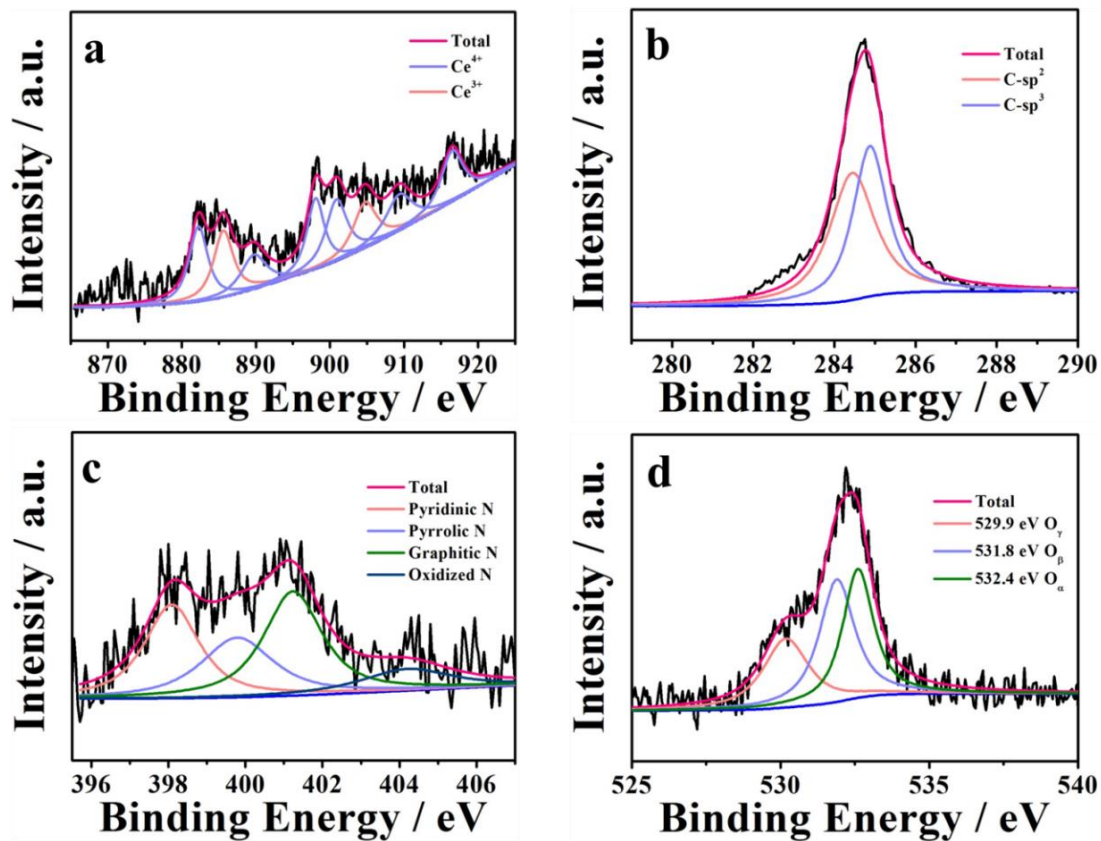

**Figure S3.** XPS high-resolution Ce 3d (a), C 1s (b), N 1s (c) and O 1s (d) spectra of CeO<sub>2</sub>@NCH.

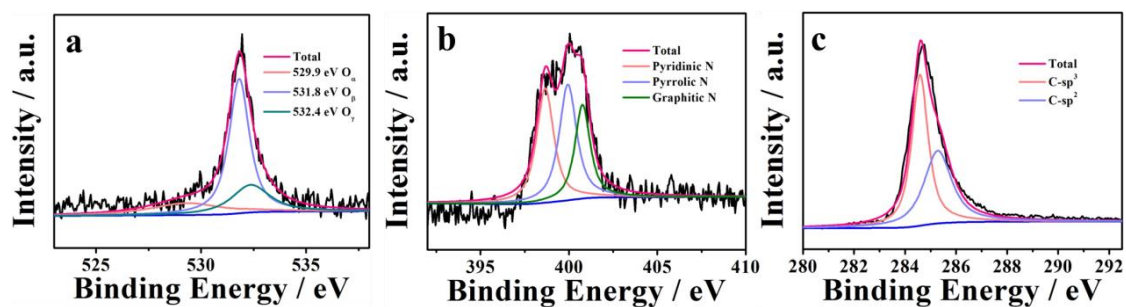

**Figure S4.** XPS high-resolution O 1s (a), N 1s (b) and C 1s (c) spectra of NCH.

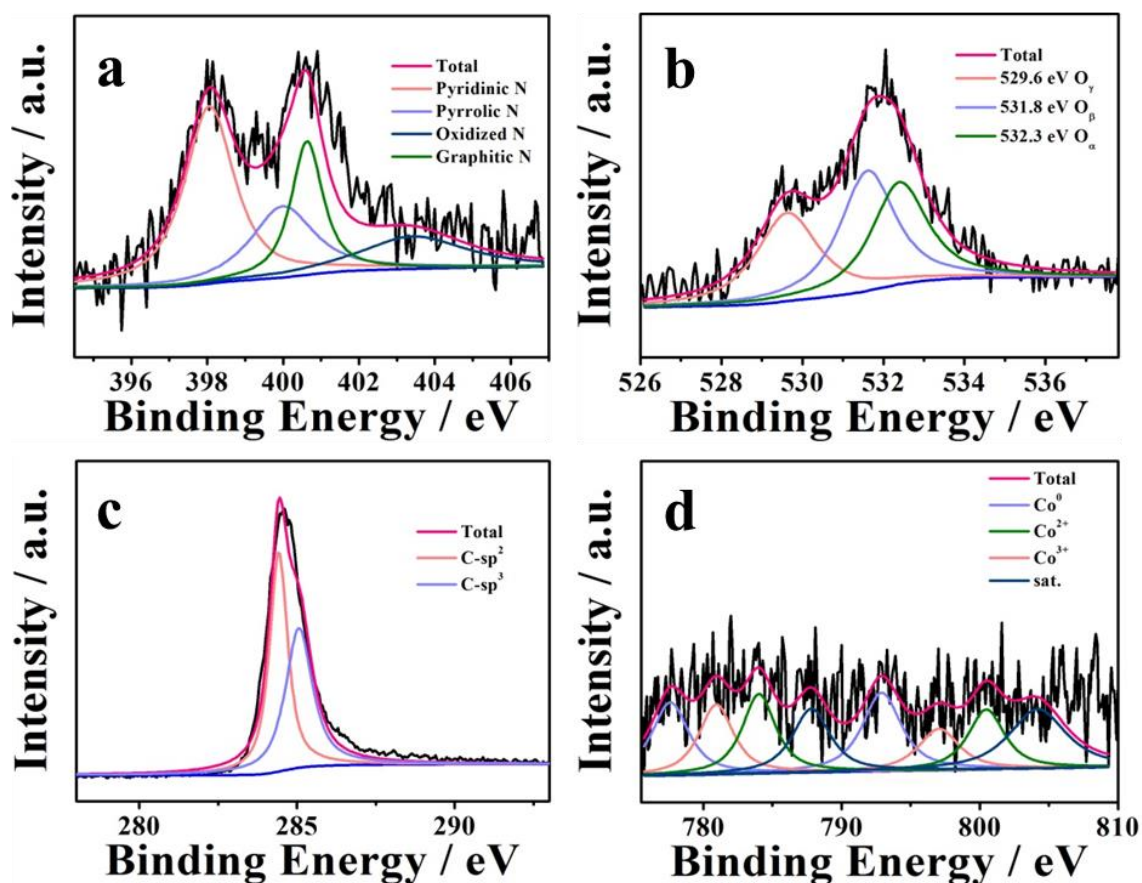

**Figure S5.** XPS high-resolution N 1s (a), O 1s (b), C 1s (c) and Co (d) spectra of Co@NCH.

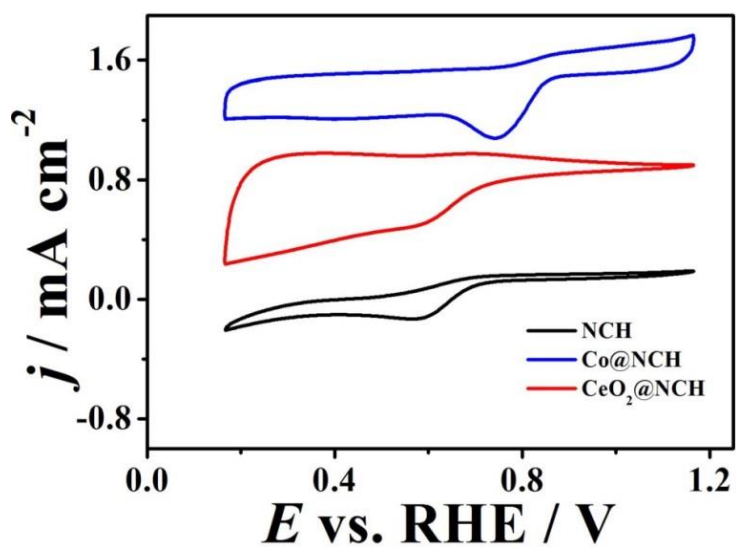

**Figure S6.** CV curves of NCH, Co@NCH and CeO<sub>2</sub>@NCH recorded in O<sub>2</sub> saturated 0.1 M KOH.

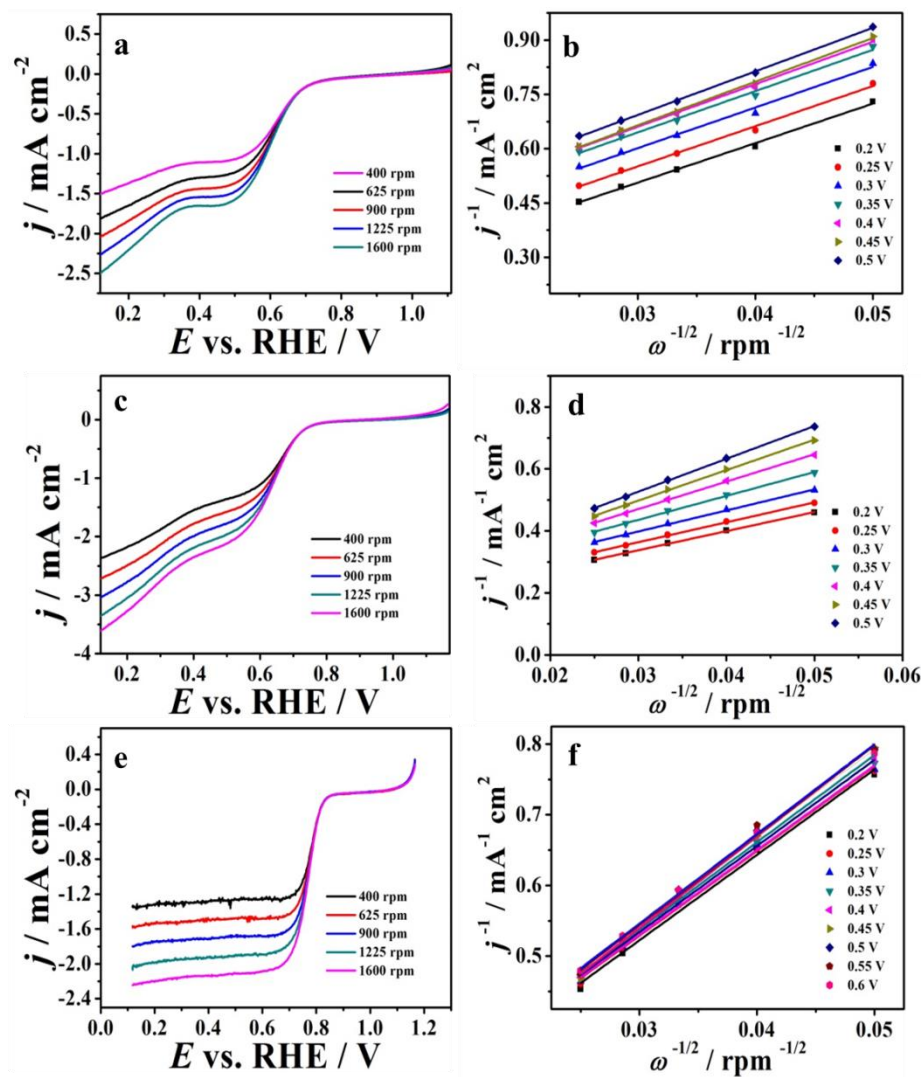

**Figure S7.** LSV curves of NCH, CeO<sub>2</sub>@NCH and Co@NCH measured at different rotating rates and corresponding K-L plots at various potential range.

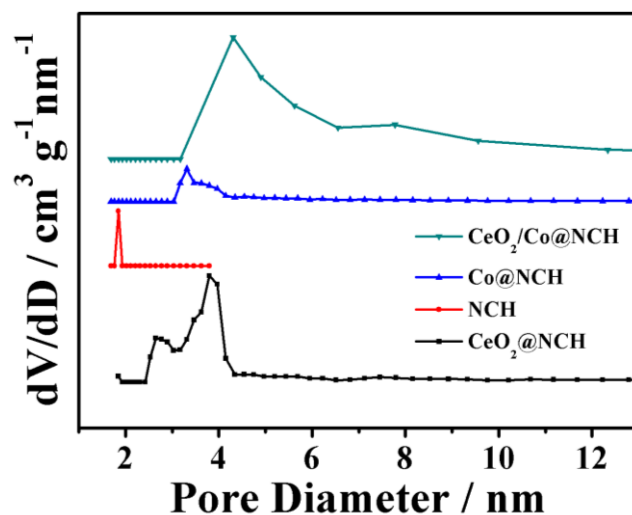

**Figure S8.** The pore size distribution curves of NCH, Co@NCH, CeO<sub>2</sub>@NCH and CeO<sub>2</sub>/Co@NCH.

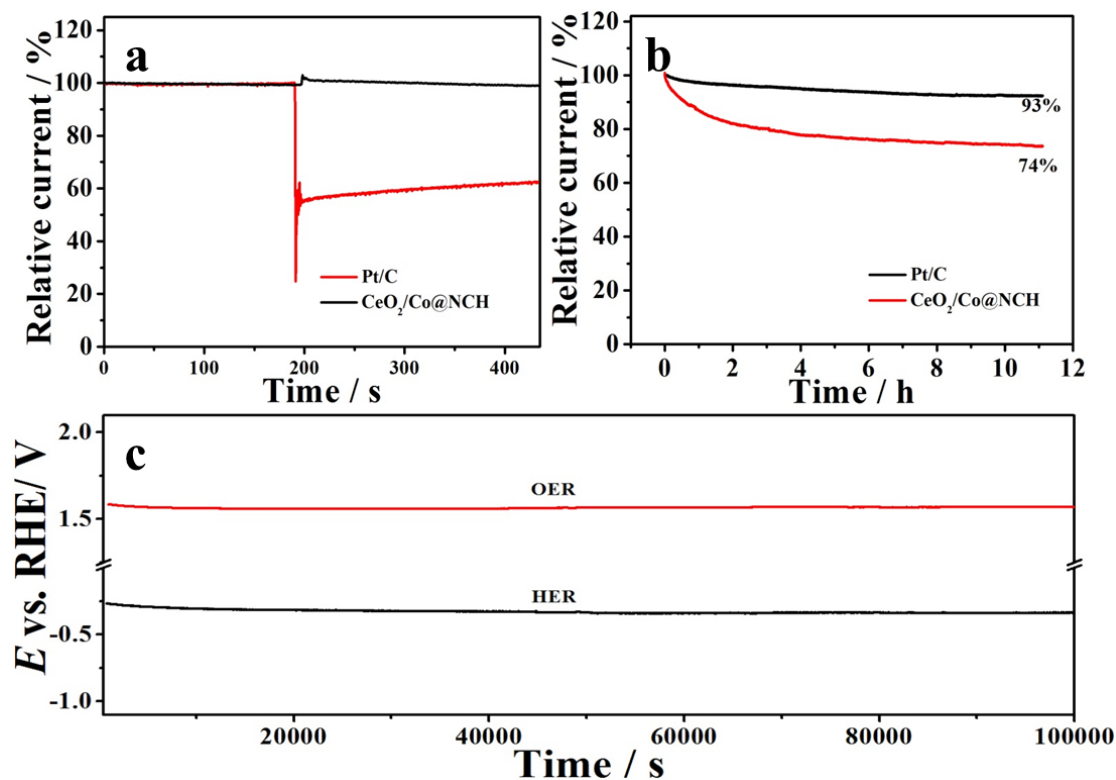

**Figure S9.** (a) methanol tolerance measurement of CeO<sub>2</sub>/Co@NCH and Pt/C samples upon introducing 3M methanol after about 200 s at 0.6 V vs. RHE. (b) i-t chronoamperometric stability measurement of CeO<sub>2</sub>/Co@NCH and Pt/C samples at 0.565 V vs. RHE. (c) The OER and HER stability of CeO<sub>2</sub>/Co@NCH under a constant current density of 10 mA cm<sup>-2</sup> for 100000 s.

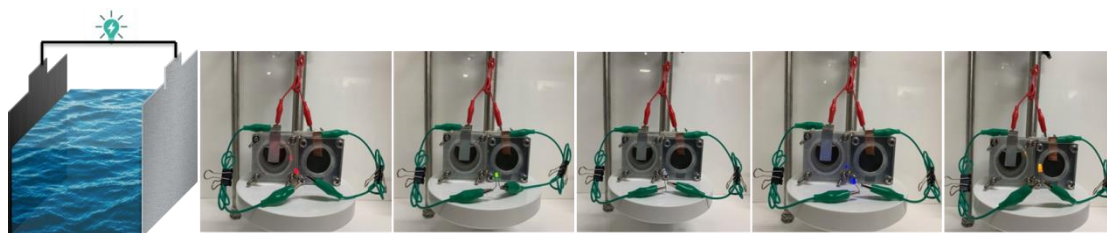

**Figure S10.** (a) Schematic illustration of the rechargeable zinc-air battery. (b) Photograph showing a series of LED powered by two liquid zinc-air batteries with the CeO<sub>2</sub>/Co@NCH cathode connected in series.

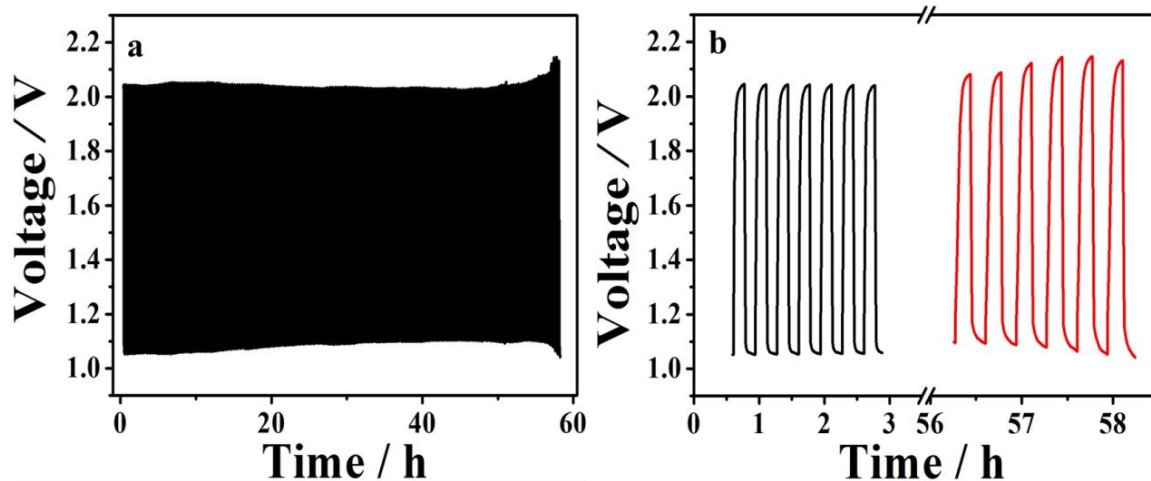

**Figure S11.** Galvanostatic discharge-charge cycling curves at  $5 \text{ mA cm}^{-2}$  of recharged Zn-air batteries with the Pt/C catalyst on carbon paper.

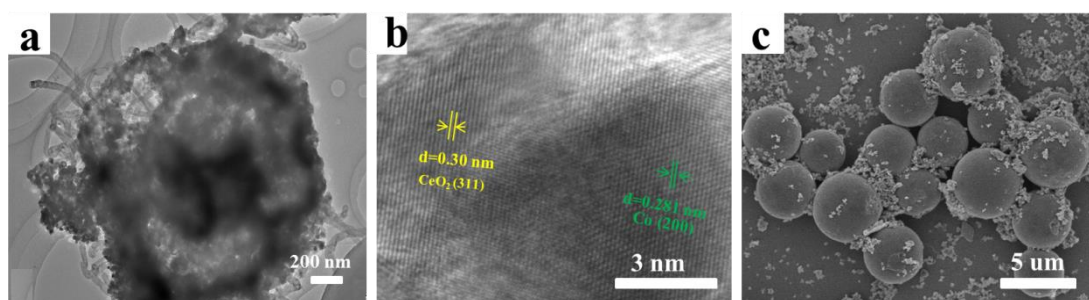

**Figure S12.** TEM (a) HRTEM (b) and SEM (c) images for  $\text{CeO}_2/\text{Co}@NCH$  after 40000 s chronoamperometric test.

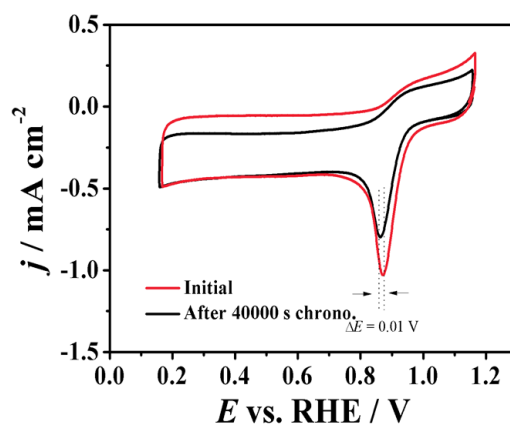

**Figure S13.** CV curves of  $\text{CeO}_2/\text{Co}@NCH$  in  $\text{O}_2$  saturated 0.1 M KOH solution

before and after 40000 s chronoamperometric test.

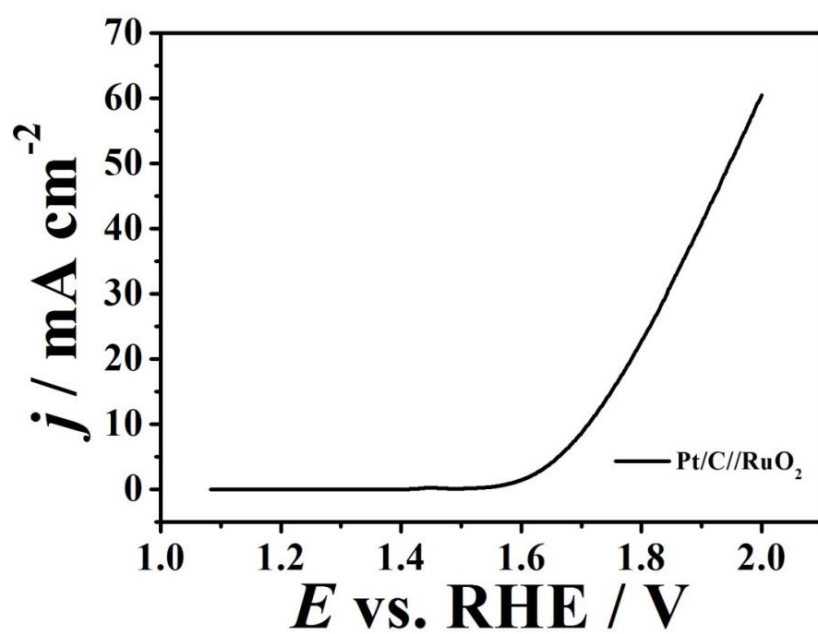

**Figure S14.** Polarization curves of Pt/C//RuO<sub>2</sub> in N<sub>2</sub>-saturated 1M KOH.

**Table S1** Comparison of ORR/OER performances of some reported CeO<sub>2</sub>-based electrocatalysts.

| Electrocatalysts                                                                  | $E_{onset}$<br>[V] | $E_{1/2}$<br>[V] | Medium | $\eta_{OER}$ , [mV]@<br>$j$ [mA·cm <sup>-2</sup> ] | $\eta_{HER}$ , [mV]@<br>$j$ [mA·cm <sup>-2</sup> ] | Medium   | Refs. |
|-----------------------------------------------------------------------------------|--------------------|------------------|--------|----------------------------------------------------|----------------------------------------------------|----------|-------|
| CeO <sub>2</sub> /Co(OH) <sub>2</sub> HCs                                         |                    |                  |        | 410@10                                             | 317@10                                             | 1M KOH   | [1]   |
| MoS <sub>2</sub> -G-Ni                                                            |                    |                  |        |                                                    | >600@10                                            | 0.1M KOH | [2]   |
| Ni-Zn/CeO <sub>2</sub>                                                            |                    |                  |        |                                                    | 410@2.74                                           | 1M KOH   | [3]   |
| g-C <sub>3</sub> N <sub>4</sub> /CeO <sub>2</sub> /Fe <sub>3</sub> O <sub>4</sub> |                    |                  |        | 400@10                                             | 310@10                                             | 1M KOH   | [4]   |
| 3D-rGO-CeO <sub>2</sub>                                                           |                    |                  |        |                                                    | 341@10                                             | 1 M KOH  | [5]   |
| Co <sub>3</sub> O <sub>4</sub> @Z67-NT@CeO <sub>2</sub>                           | -0.95              | 0.88             | 0.1 M  | 350@10                                             |                                                    | 0.1M KOH | [6]   |
| Ni <sub>2</sub> P-CeO <sub>2</sub> /TM                                            |                    |                  |        |                                                    | 84@20                                              | 1 M KOH  | [7]   |
| Fe <sub>x</sub> Ni <sub>y</sub> /CeO <sub>2</sub> /NC                             |                    |                  |        | 240@10                                             | 240@10                                             | 1 M KOH  | [8]   |
| Co-CeO <sub>2</sub> /N-CNR                                                        | -0.90              | 0.82             |        | 410@10                                             |                                                    | 0.1M KOH | [9]   |
| Co@NPC-900                                                                        | 0.88               | 0.76             |        | 380@10                                             |                                                    | 0.1M KOH | [10]  |
| Ni/CeO <sub>2</sub> /CNTs                                                         |                    |                  |        |                                                    | ~220@10                                            | 1 M KOH  | [11]  |
| CoCe-600N <sub>2</sub>                                                            | -0.97              | -0.86            | 0.1 M  | 274@10                                             |                                                    | 0.1M KOH | [12]  |
| CeO <sub>2</sub> -Cu <sub>3</sub> P/NF                                            |                    |                  |        |                                                    | ~91@10                                             | 1 M KOH  | [13]  |
| Co-W/CeO <sub>2</sub>                                                             |                    |                  |        |                                                    | 166@10                                             | 1 M NaOH | [14]  |
| Co-CeO <sub>2</sub> -N-C                                                          | 0.89               | 0.82             | 0.1 M  | 326@10                                             |                                                    | 1 M KOH  | [15]  |
| CeO <sub>2</sub> /rGO                                                             | 0.946              | 0.84             | 0.1 M  | 500@10                                             |                                                    | 0.1M KOH | [16]  |
| CeO <sub>2</sub> nanowires                                                        | 0.756              | 0.666            | 0.1 M  | 700@10                                             |                                                    | 0.1M KOH | [17]  |

## References

- [1] M.-C. Sung, G.-H. Lee and D.-W. Kim, *J. Alloys Compd.*, 2019, **800**, 450-455.
- [2] X. Geng, W. Wu, N. Li, W. Sun, J. Armstrong, *Adv. Funct. Mater.*, 2014, **24**, 6123-6129.
- [3] Z. Zheng, N. Li, C.-Q. Wang, D.-Y. Li, F.-Y. Meng and Y.-M. Zhu, *J. Power Sources*, 2013, **222**, 88-91.
- [4] J. Rashid, N. Parveen, T. u. Haq, A. Iqbal, S. H. Talib, S. U. Awan, N. Hussain and M. Zaheer, *ChemCatChem*, 2018, **10**, 5587-5592.



- [5] M. Liu, Z. Ji, X. Shen, H. Zhou, J. Zhu, X. Xie, C. Song, X. Miao, L. Kong and G. Zhu, *Eur. J. Inorg. Chem.*, 2018, **2018**, 3952-3959.
- [6] X. Li, S. You, J. Du, Y. Dai, H. Chen, Z. Cai, N. Ren and J. Zou, *J. Mater. Chem. A*, 2019, **7**, 25853-25864.
- [7] M. Zhang, Q. Dai, H. Zheng, M. Chen and L. Dai, *Adv. Mater.*, 2018, **30**, 1705431.
- [8] L. Chen, H. Jang, M. G. Kim, Q. Qin, X. Liu and J. Cho, *Inorg. Chem. Front.*, 2020, DOI: 10.1039/c9qi01251f.
- [9] A. Sivanantham, P. Ganesan and S. Shanmugam, *Appl. Catal. B*, 2018, **237**, 1148-1159.
- [10] H.-S. Lu, H. Zhang, R. Liu, X. Zhang, H. Zhao and G. Wang, *Appl. Surf. Sci.*, 2017, **392**, 402-409.
- [11] C. Zhang, W. Zhang, N. E. Drewett, X. Wang, S. J. Yoo, H. Wang, T. Deng, J. G. Kim, H. Chen, K. Huang, S. Feng and W. Zheng, *ChemSusChem*, 2019, **12**, 1000-1010.
- [12] X. He, X. Yi, F. Yin, B. Chen, G. Li and H. Yin, *J. Mater. Chem. A*, 2019, **7**, 6753-6765.
- [13] Z. Wang, H. Du, Z. Liu, H. Wang, A. M. Asiri and X. Sun, *Nanoscale*, 2018, **10**, 2213-2217.
- [14] M. Sheng, W. Weng, Y. Wang, Q. Wu and S. Hou, *J. Alloys Compd.*, 2018, **743**, 682-690.
- [15] Z. Zhang, D. Gao, D. Xue, Y. Liu, P. Liu, J. Zhang and J. Qian, *Nanotechnol.*, 2019, **30**, 395401.
- [16] L. Sun, L. Zhou, C. Yang and Y. Yuan, *Int. J. Hydrogen Energy*, 2017, **42**, 15140-15148.
- [17] Y. Yang, T. Yue, Y. Wang, Z. Yang and X. Jin, *Microchem. J.*, 2019, **148**, 42-50.
